# Supplementary material for: Cutaneous stimulation at the ankle: a differential effect on proprioceptive postural control according to the participants’ preferred sensory strategy
Source: J Foot Ankle Res. 2016 Mar 8;9:9. doi: 10.1186/s13047-016-0140-y (PMC4782337; doi:10.1186/s13047-016-0140-y)
Supplement: Additional file 1: — Data sets of the study. (XLSX 53 kb) [file 13047_2016_140_MOESM1_ESM.xlsx]

## Sheet: RPw
Dplt					Session 2		SEM		Vitesse					Session 2
Suj	bf	bt	Diff brute		bf	ch			Suj	bf	ch	Diff brute		bf	ch
1	66.1783	86.6706	20.4923						1	79.4657	81.7079	2.24225
2	58.3458	83.4824	25.1366						2	58.9252	86.0367	27.1115
3	84.4289	90.2959	5.86693		66.4941	94.1977	-17.9348		3	35.3565	84.6854	49.3288		89.9259	90.9576	54.5694
4	32.7798	86.6778	53.898		57.3706	77.8606	24.5908		4	64.6664	82.6292	17.9628		66.6285	90.6164	1.96213
5	69.1467	92.8362	23.6895		69.1467	92.8362			5	76.0271	93.5993	17.5722		71.2384	81.3355
6	95.123	77.611	-17.512						6	88.5788	85.3982	-3.18064
7	42.3905	87.9285	45.538		38.8606	55.7494	-3.52986		7	87.889	65.5212	-22.3677		29.0911	66.7545	-58.7979
8	88.4129	67.333	-21.0799		70.4013	88.4108	-18.0117		8	96.2621	82.8416	-13.4205		19.3084	88.1379	-76.9537
9	68.4156	81.6731	13.2575		19.7998	90.8074	-48.6159		9	76.9554	87.3478	10.3924		14.9117	92.3845	-62.0436
10	36.1641	84.6745	48.5104		61.3458	67.7172	25.1817		10	10.9278	89.2276	78.2998		4.10907	80.6846	-6.81868
11	93.3658	88.6621	-4.70372						11	69.8398	91.3311	21.4913
12	33.3611	94.6447	61.2837		90.5622	66.675	57.2011		12	57.7961	87.8618	30.0657		81.4118	40.7326	23.6158
13	74.4786	81.6378	7.1592		74.4786	81.6378			13	60.977	81.3047	20.3277		60.977	81.3047
14	95.7001	50.2844	-45.4158		72.7827	75.1079	-22.9174		14	74.0374	69.927	-4.11035		57.5798	86.9951	-16.4576
15	74.2843	85.3447	11.0604		82.6816	29.4909	8.39732		15	85.4203	89.5945	4.1742		90.8626	85.267	5.44237
16	75.5916	98.2452	22.6536		97.1083	91.4276	21.5167		16	81.295	77.2033	-4.09174		92.0775	94.7	10.7825
17	80.127	53.8607	-26.2664		51.2112	83.4721	-28.9159		17	82.2253	53.372	-28.8534		80.9123	93.4245	-1.31303
18	80.726	78.4295	-2.29649		96.9527	75.5859	16.2268		18
19	63.3803	66.0794	2.69905						19	68.5682	95.5939	27.0257
20	45.5381	78.6428	33.1047		47.9754	64.8641	2.43731		20	64.3977	86.4582	22.0605		94.2074	58.4196	29.8096
21	93.5784	93.084	-0.494416		84.6677	87.6387	-8.91067		21	55.9305	90.9557	35.0253		61.7591	82.2825	5.82867
22	81.6619	90.6635	9.00164		39.6792	71.7367	-41.9827		22	87.1635	53.1492	-34.0143		55.7781	83.6145	-31.3854
23	65.9796	53.1986	-12.781		89.0234	83.6839	23.0438		23	64.5204	85.0595	20.5391		84.1051	85.5449	19.5846
24	69.7836	98.5743	28.7907		31.5583	61.2129	-38.2252		24	11.2727	67.1756	55.9029		38.2093	12.3125	26.9367
25	42.4252	77.0211	34.596		65.7296	87.9236	23.3044		25	80.234	88.0781	7.84412		30.9486	6.78439	-49.2854
26	93.6713	49.7194	-43.9519		89.7345	61.1188	-3.93678		26	49.9562	77.7633	27.8071		98.2526	85.6057	48.2964
27	85.0182	62.7054	-22.3128						27	92.6449	87.7436	-4.90123
28	92.3832	59.0782	-33.305						28	18.6078	37.4388	18.831
29	81.2829	89.013	7.73013						29	56.7801	50.8973	-5.88276
30	55.7321	71.964	16.232						30	82.2341	49.6451	-32.5891
31	78.1981	77.6306	-0.567469			SEM	19.7476		31	76.3485	79.2479	2.89937			SEM	26.9468
32	64.0089	76.7509	12.742			Seuil	60.6196		32	37.6794	47.9438	10.2645			Seuil	49.2509
33	95.695	66.8598	-28.8353						33	89.1102	77.7755	-11.3347
34	84.5906	99.7756	15.185						34	15.4968	83.0293	67.5325
35	51.4981	75.5031	24.005						35	4.64295	59.512	54.869
36	78.3361	79.2832	0.947083						36	75.6928	95.6001	19.9073
37	83.977	99.1106	15.1335						37	76.7174	75.01	-1.70734
38	65.7296	46.0538	-19.6758						38	99.4459	84.1402	-15.3058
39	91.1167	96.2561	5.13938						39	94.2982	58.7187	-35.5795
40	43.8705	79.1335	35.263						40	56.6253	93.5764	36.9511
41	71.6953	73.0061	1.31072						41	95.7211	90.7476	-4.97347
42	63.669	81.1302	17.4611						42	95.8787	90.844	-5.03467
43	97.7385	80.3259	-17.4127						43	68.2402	97.5737	29.3335
44	67.5115	68.2084	0.696978						44	98.7694	73.2802	-25.4893
45	95.5503	91.2253	-4.32501						45	94.4789	93.8386	-0.640243
46	84.9301	97.6082	12.6781						46	86.5909	82.0949	-4.49598
47	76.6328	89.3174	12.6845						47	99.4632	90.6066	-8.85654
MOY	72.6426	79.5152							MOY	69.2207	78.9802
SD	18.2552	14.2071							SD	25.5622	14.9069
t test	0.0569646								t test	0.0156074
Pearson	-0.810061								Pearson	-0.8354
Cohen d	0.43	medium
CI	5.21897	4.06167
	[67.42, 77.86]	[75.45, 83.58]

## Sheet: Subgroups
Dplt	LOW			HIGH					Vitesse
Suj	bf	bt	Suj	bf	ch				Suj	bf	bt	Suj	bf	ch
4	32.7798	86.6778	19	63.3803	66.0794				35	4.64295	59.512	21	55.9305	90.9557
12	33.3611	94.6447	42	63.669	81.1302				10	10.9278	89.2276	40	56.6253	93.5764
10	36.1641	84.6745	32	64.0089	76.7509				24	11.2727	67.1756	29	56.7801	50.8973
7	42.3905	87.9285	38	65.7296	46.0538				34	15.4968	83.0293	12	57.7961	87.8618
25	42.4252	77.0211	23	65.9796	53.1986				28	18.6078	37.4388	2	58.9252	86.0367
40	43.8705	79.1335	1	66.1783	86.6706				3	35.3565	84.6854	13	60.977	81.3047
20	45.5381	78.6428	44	67.5115	68.2084				32	37.6794	47.9438	20	64.3977	86.4582
35	51.4981	75.5031	9	68.4156	81.6731				26	49.9562	77.7633	23	64.5204	85.0595
30	55.7321	71.964	5	69.1467	92.8362					22.9925	68.347	4	64.6664	82.6292
2	58.3458	83.4824	24	69.7836	98.5743					15.9939	18.7396	43	68.2402	97.5737
	44.2105	81.9673	41	71.6953	73.0061							19	68.5682	95.5939
	8.86413	6.77794	15	74.2843	85.3447							11	69.8398	91.3311
[1.74, 8.32]	Cohen d	5.03	13	74.4786	81.6378							14	74.0374	69.927
		huge	16	75.5916	98.2452							36	75.6928	95.6001
	5.49394	4.20094	47	76.6328	89.3174							5	76.0271	93.5993
	[38.72, 49.7]	[77.77, 86.17]	31	78.1981	77.6306							31	76.3485	79.2479
			36	78.3361	79.2832							37	76.7174	75.01
			17	80.127	53.8607							9	76.9554	87.3478
			18	80.726	78.4295							1	79.4657	81.7079
			29	81.2829	89.013							25	80.234	88.0781
			22	81.6619	90.6635							16	81.295	77.2033
			37	83.977	99.1106							17	82.2253	53.372
			3	84.4289	90.2959							30	82.2341	49.6451
			34	84.5906	99.7756							15	85.4203	89.5945
			46	84.9301	97.6082							46	86.5909	82.0949
			27	85.0182	62.7054							22	87.1635	53.1492
			8	88.4129	67.333							7	87.889	65.5212
			39	91.1167	96.2561							6	88.5788	85.3982
			28	92.3832	59.0782							33	89.1102	77.7755
			11	93.3658	88.6621							27	92.6449	87.7436
			21	93.5784	93.084							39	94.2982	58.7187
			26	93.6713	49.7194							45	94.4789	93.8386
			6	95.123	77.611							41	95.7211	90.7476
			45	95.5503	91.2253							42	95.8787	90.844
			33	95.695	66.8598							8	96.2621	82.8416
			14	95.7001	50.2844							44	98.7694	73.2802
			43	97.7385	80.3259							38	99.4459	84.1402
				80.327	78.8525							47	99.4632	90.6066
				10.9971	15.6302							18
				Cohen d	0.11	[-2.93, 3.14]							78.953	81.2187
					negligible								13.6736	13.1997
				3.54346	5.03629
				[76.78, 83.87]	[73.82, 83.89]
